# Supplementary material for: Stability Performance of Inductively Coupled Plasma Mass Spectrometry-Phenotyped Kernel Minerals Concentration and Grain Yield in Maize in Different Agro-Climatic Zones
Source: PLoS One. 2015 Sep 25;10(9):e0139067. doi: 10.1371/journal.pone.0139067 (PMC4583500; doi:10.1371/journal.pone.0139067)
Supplement: S11 Table — (XLSX) [file pone.0139067.s012.xlsx]

## Sheet: S11 Table
S11 Table. Mean kernel Cu concentration (mg kg–1) and estimates of stability parameters along with respective ranks for 50 genotypes tested in six tested environments.
Genotype	Mean	AMMI Parameters						GGED	Joint Regression
		SIPC1	SIPCF	EV1	EVF	D	ASV		b	S2d
G1	2.8	0.29	1.08	0.01	0.02	0.59	0.41	22.5	1.76	-0.02
G2	3.92	0.02	1.41	0	0.09	1.29	0.06	52	1.9	6.98
G3	2.68	0.29	1.12	0.01	0.02	0.61	0.59	62	0.74	1.36
G4	2.35	0.09	0.45	0	0.01	0.32	0.12	24.5	0.77	-0.03
G5	1.98	0.03	0.35	0	0	0.23	0.03	42.5	0.74	-0.1
G6	1.55	0.25	1.42	0.01	0.03	0.72	0.53	87	0.9	1.72
G7	1.92	0.49	3.13	0.04	0.17	1.83	1.73	75	-0.47	3.88
G8	2.14	0.08	0.31	0	0	0.18	0.11	47	0.95	0.72
G9	3.23	0.12	0.47	0	0	0.25	0.17	12	1.11	-0.24
G10	1.89	0	0.43	0	0	0.26	0.22	48.5	0.63	-0.1
G11	1.38	0.02	0.3	0	0	0.19	0.11	60.5	0.45	-0.27
G12	1.89	0.04	0.34	0	0	0.21	0.06	51.5	0.86	-0.25
G13	1.95	0.25	0.49	0.01	0	0.31	0.38	48.5	0.75	-0.08
G14	2.04	1.51	2.24	0.39	0.11	1.6	2.07	77	-0.48	1.45
G15	3.92	0.21	0.82	0.01	0.01	0.46	0.38	39	1.43	1.51
G16	3.55	0.05	0.33	0	0	0.19	0.09	31	1.59	-0.26
G17	2.15	0.01	0.62	0	0.01	0.39	0.08	51	0.88	0.32
G18	2.23	0.39	1.49	0.03	0.03	0.78	0.64	66	1.2	2.39
G19	1.68	0.19	0.83	0.01	0.01	0.45	0.29	67	0.56	0.17
G20	2.55	0.04	0.23	0	0	0.12	0.08	21.5	0.95	-0.32
G21	1.89	0.14	0.38	0	0	0.2	0.21	44	0.84	-0.27
G22	2.62	0.53	1.43	0.05	0.03	0.82	0.84	64.5	1.69	2.37
G23	2.61	0.21	0.32	0.01	0	0.22	0.3	39	0.97	0.37
G24	2.06	0.07	1.32	0	0.03	0.74	0.37	76	0.79	3.05
G25	2.36	0.25	1.12	0.01	0.03	0.74	0.34	35.5	1.47	1.32
G26	2.24	0.25	0.86	0.01	0.01	0.47	0.46	67	1.32	0.54
G27	1.75	0.03	0.62	0	0.01	0.37	0.1	67.5	0.83	0.01
G28	3.74	0.32	1.11	0.02	0.03	0.77	0.45	33	0.95	1.46
G29	2.69	0.1	0.51	0	0	0.27	0.15	41	1.29	0.28
G30	1.48	0.13	0.62	0	0.01	0.33	0.28	67	0.39	0.08
G31	1.78	0.06	0.62	0	0.01	0.39	0.31	74.5	0.74	0.35
G32	3.24	0.5	1.03	0.04	0.02	0.61	0.72	43	1.64	0.35
G33	3.25	0.34	0.96	0.02	0.01	0.52	0.49	30	1.6	0.53
G34	2.05	0.06	0.29	0	0	0.16	0.09	37.5	0.83	-0.21
G35	2.06	0.6	1.19	0.06	0.02	0.72	0.91	77	0.19	1.17
G36	2.26	0.01	0.18	0	0	0.1	0.05	37.5	0.85	0.47
G37	3.21	0.16	0.37	0	0	0.21	0.22	11.5	1.59	-0.21
G38	2.25	0.58	0.9	0.06	0.02	0.64	0.8	56	0.52	0.95
G39	1.72	0.11	0.7	0	0.01	0.38	0.25	73	0.6	0.33
G40	2.18	0.16	0.78	0	0.01	0.41	0.37	55	0.78	0.01
G41	1.75	0.05	0.35	0	0	0.23	0.11	61.5	0.63	-0.2
G42	1.65	0.07	0.62	0	0.01	0.42	0.1	77	0.76	0.01
G43	2.62	0.39	0.94	0.03	0.01	0.53	0.62	24	0.98	1.63
G44	3.59	0.76	1.87	0.1	0.05	1	1.13	53	2.27	2.7
G45	1.5	0.04	0.45	0	0.01	0.37	0.06	63	0.82	0.11
G46	3.08	0.33	1.17	0.02	0.02	0.66	0.6	44	1.31	0.44
G47	2.92	0.22	1.58	0.01	0.05	0.92	0.36	49.5	1.99	2
G48	2.97	0.1	0.8	0	0.01	0.42	0.32	32	1.55	0.11
G49	1.51	0.29	0.9	0.01	0.01	0.49	0.41	84.5	0.5	0.5
G50	3.43	0.21	0.83	0.01	0.02	0.59	0.62	46	2.09	0.46
Ranks	Mean	SIPC1	SIPCF	EV1	EVF	D	ASV	GGED	b	S2d
G1	14	37	36	32.5	36	33.5	33.5	4	43	14
G2	1.5	4.5	43	13.5	48	48	4	28	45	50
G3	16	37	38.5	32.5	36	35.5	39	34	22	38
G4	22	18	14.5	13.5	24.5	17	15	6	18	13
G5	34	6.5	9.5	13.5	8.5	11.5	1	17	22	10.5
G6	46	33.5	44	32.5	42.5	39.5	38	50	6	43
G7	36	44	50	44.5	50	50	49	44	49	49
G8	29	17	5	13.5	8.5	4	13	22	4	34
G9	9	22	16	13.5	8.5	13	17	2	7	6
G10	38	1	13	13.5	8.5	14	19.5	23.5	27.5	10.5
G11	50	4.5	4	13.5	8.5	5.5	13	32	35.5	2.5
G12	38	9	8	13.5	8.5	8.5	4	27	9	5
G13	35	33.5	17	32.5	8.5	16	31.5	23.5	20	12
G14	33	50	49	50	49	49	50	47	50	39
G15	1.5	29	27	32.5	24.5	28	31.5	14.5	30	41
G16	5	11.5	7	13.5	8.5	5.5	8.5	8	37.5	4
G17	28	2.5	21	13.5	24.5	22.5	6.5	26	8	23
G18	26	42.5	46	42.5	42.5	44	43	37	15	46
G19	44	27	28.5	32.5	24.5	27	23	39	31	21
G20	20	9	2	13.5	8.5	2	6.5	3	4	1
G21	38	24	12	13.5	8.5	7	18	19.5	11	2.5
G22	17.5	46	45	46	42.5	45	46	36	42	45
G23	19	29	6	32.5	8.5	10	24	14.5	2	27
G24	30.5	15.5	42	13.5	42.5	41.5	29.5	45	16	48
G25	21	33.5	38.5	32.5	42.5	41.5	27	11	32	37
G26	25	33.5	30	32.5	24.5	29	36	39	26	33
G27	41.5	6.5	21	13.5	24.5	19.5	10.5	41	12.5	16
G28	3	39	37	40	42.5	43	35	10	4	40
G29	15	19.5	18	13.5	8.5	15	16	16	24	22
G30	49	23	21	13.5	24.5	18	22	39	40	18
G31	40	13.5	21	13.5	24.5	22.5	25	43	22	25.5
G32	8	45	35	44.5	36	35.5	44	18	41	25.5
G33	7	41	34	40	24.5	31	37	7	39	32
G34	32	13.5	3	13.5	8.5	3	8.5	12.5	12.5	7.5
G35	30.5	48	41	47.5	36	39.5	47	47	44	36
G36	23	2.5	1	13.5	8.5	1	2	12.5	10	30
G37	10	25.5	11	13.5	8.5	8.5	19.5	1	37.5	7.5
G38	24	47	31.5	47.5	36	37	45	31	33	35
G39	43	21	24	13.5	24.5	21	21	42	29	24
G40	27	25.5	25	13.5	24.5	24	29.5	30	17	16
G41	41.5	11.5	9.5	13.5	8.5	11.5	13	33	27.5	9
G42	45	15.5	21	13.5	24.5	25.5	10.5	47	19	16
G43	17.5	42.5	33	42.5	24.5	32	41.5	5	1	42
G44	4	49	48	49	46.5	47	48	29	48	47
G45	48	9	14.5	13.5	24.5	19.5	4	35	14	19.5
G46	11	40	40	40	36	38	40	19.5	25	28
G47	13	31	47	32.5	46.5	46	28	25	46	44
G48	12	19.5	26	13.5	24.5	25.5	26	9	35.5	19.5
G49	47	37	31.5	32.5	24.5	30	33.5	49	34	31
G50	6	29	28.5	32.5	36	33.5	41.5	21	47	29
